# Supplementary material
Source: PubMed Central journal article supplement (PMC2891026)
Supplement: NIHMS200088-supplement-supp_text_fig.pdf [file NIHMS200088-supplement-supp_text_fig.pdf]

## Supplementary Information for

### Chromatin-level regulation of biosynthetic gene clusters

Jin Woo Bok<sup>1,2,9</sup>, Yi-Ming Chiang<sup>4,5,9</sup>, Edyta Szewczyk<sup>7,10</sup>, Yazmid Reyes-Domingez<sup>8</sup> Ashley D Davidson<sup>7</sup>, James F Sanchez<sup>5</sup>, Hsien-Chun Lo<sup>5</sup>, Kenji Watanabe<sup>5</sup>, Joseph Strauss<sup>8</sup>, Berl R Oakley<sup>7,11</sup>, Clay C C Wang<sup>5,6\*</sup> and Nancy P Keller<sup>1,2,3\*</sup>

## Table of Contents

### 1. Supplementary Figures

**Supplementary Figure 1.** Results of chromatin immunoprecipitation (ChIP) analysis of two genes up-regulated in the *cclA*Δ strain.

**Supplementary Figure 2.** Thin layer chromatography of chloroform extracts from three *A. nidulans* strains differing only in presence of *cclA* and *laeA*.

**Supplementary Figure 3.** Order of genes in the monodictyphenone gene cluster.

**Supplementary Figure 4.** UV/Vis and ESI-MS in negative mode of (a) austinol (**7**), (b) dehydroaustinol (**8**), (c) monodictyphenone (**9**), (d) emodin (**10**) (e) ω-hydroxyemodin (**11**), (f) emodic acid (**12**), (g) 2-hydroxyemodin (**13**), (h) 2-aminoemodin (**14**), (i) F9775B (**17**), (j) F9775A (**18**).

### 2. Supplementary Tables

**Supplementary Table 1.** Gene identities in two novel CclA regulated secondary metabolite gene clusters.

**Supplementary Table 2.** Fungal strains used in this study.

**Supplementary Table 3.** Primers used in this study.

**Supplementary Table 4.** NMR data for compounds **10** – **14** (400 and 100 MHz in DMSO-*d*<sub>6</sub>).

**Supplementary Table 5.** NMR data for compound **17** and **18** (400 and 100 MHz in DMSO-*d*<sub>6</sub>).

### 3. Supplementary Methods

#### Strains

Gene deletions or *alcA* promoter exchange of *cclA* (AN9399), *stcJ* (AN7815), *mdpG* (AN0150), *mdpE* (AN0148), AN7909 and other polyketides

#### Nucleic Acid Manipulations

**ChIP coupled to quantitative PCR analysis**

**Fermentation and LC/MS analysis**

**Isolation and identification of secondary metabolites**

**Compound identification**

**Compound spectral data**

Supplementary Figure1

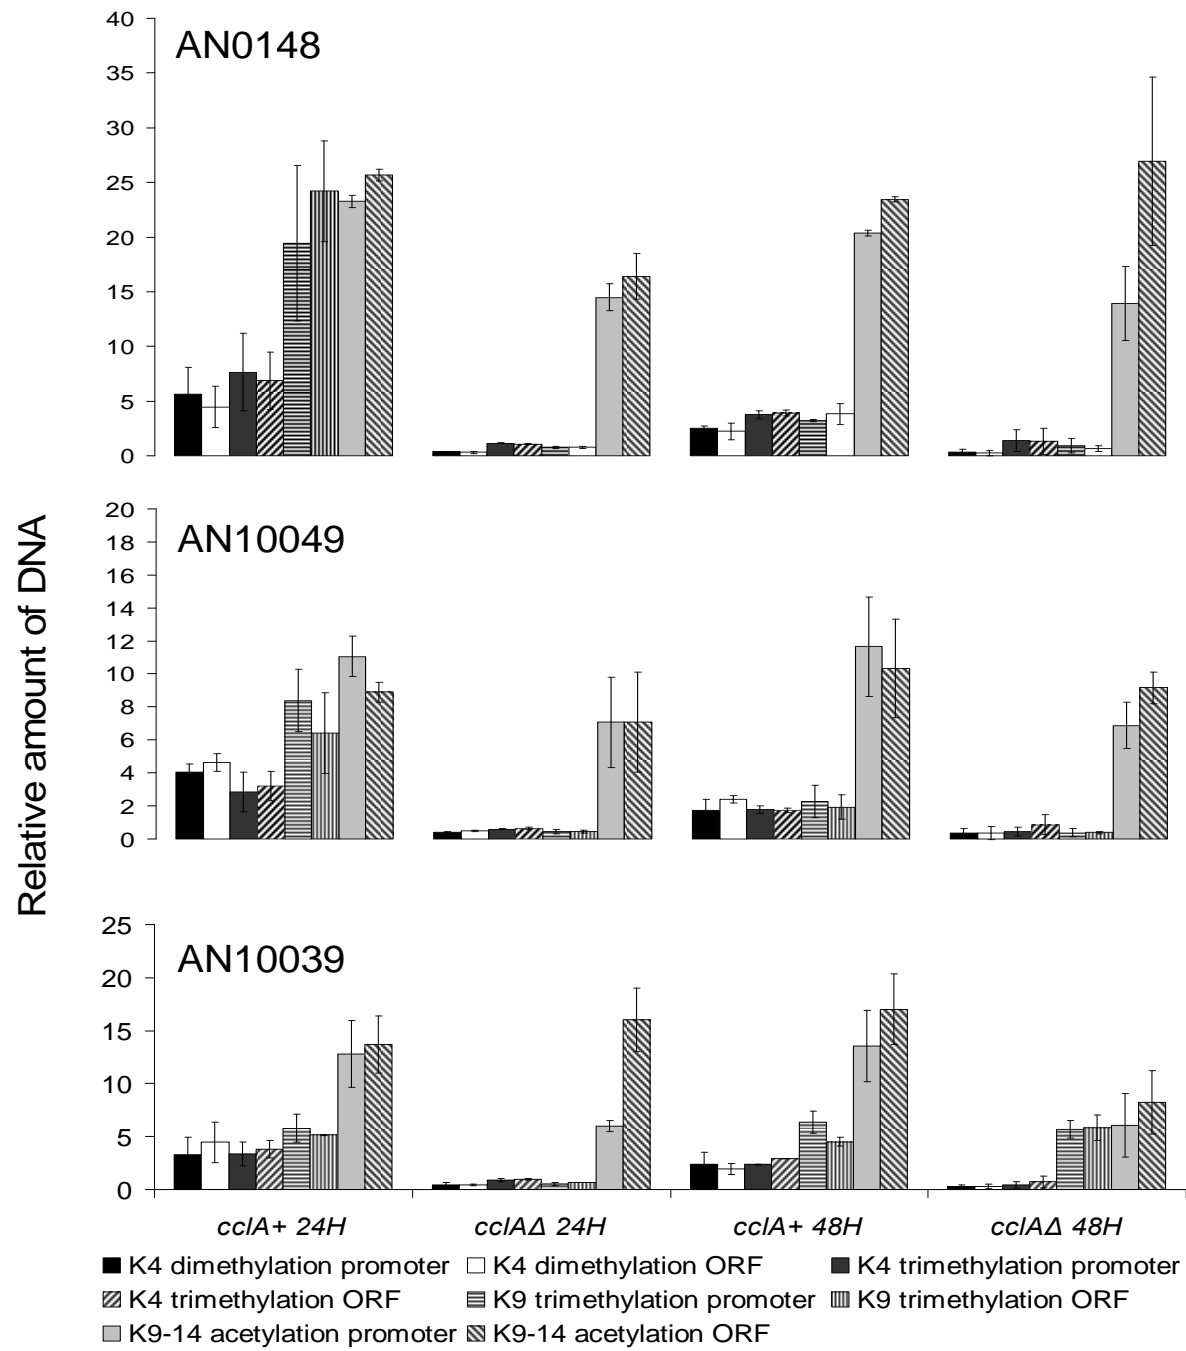

**Supplementary Figure 1.** Results of chromatin immunoprecipitation (ChIP) analysis of two genes up-regulated in the *cclA* $\Delta$  strain and proposed to be involved in the biosynthesis of monodictyphenone (AN0148 and AN10049) and one gene residing near the proposed biosynthesis cluster (AN10039) but lacking activation in *cclA* $\Delta$ , and most probably not involved in the biosynthetic pathway (see also Figure 1). The ChIP procedure is detailed in Supplementary Materials and Methods. Antibodies used for IP were specific to histone H3 lysine 4 in the dimethylated (K4 dimethylation) or the trimethylated (K4 trimethylation) state, or specific to histone H3 lysine 9 in the trimethyl state (K9 trimethylation). Analysis of histone H3 acetylation state was carried out using an antibody recognizing histone H3 acetylated at lysine 9 and lysine 14 (K9-14 acetylation). For each gene precipitated DNA was amplified with one primer set immediately upstream (promoter) and downstream (ORF) of the predicted start codon. “Relative amount of DNA” given on the y-axis indicates the level of the specific modification in histone H3 and is calculated from the ratio of the DNA amount obtained from modified H3 IPs (methylated or acetylated at the indicated lysine residues) to the DNA amount obtained from total H3 IPs at the amplified locus. We compare the isogenic wild type strain (*cclA*<sup>+</sup>) or the *cclA* deletion strain (*cclA* $\Delta$ ). ChIPs were performed after 24 hours (24H) and 48 hours (48H) of cultivation in glucose minimal medium (GMM). Transcriptional activation of genes AN0148 and AN10049 in the *cclA* $\Delta$  strain after 48 hours of growth is correlated with hypomethylated K4 and K9 at H3, as well as with high levels of K9 and K14 acetylation, whereas the promoter and ORF of AN10039, the gene lacking activation under the same conditions, is characterized by high levels of trimethylated H3K9 and reduced levels of H3K9-K14 acetylation.

## Supplementary Figure 2

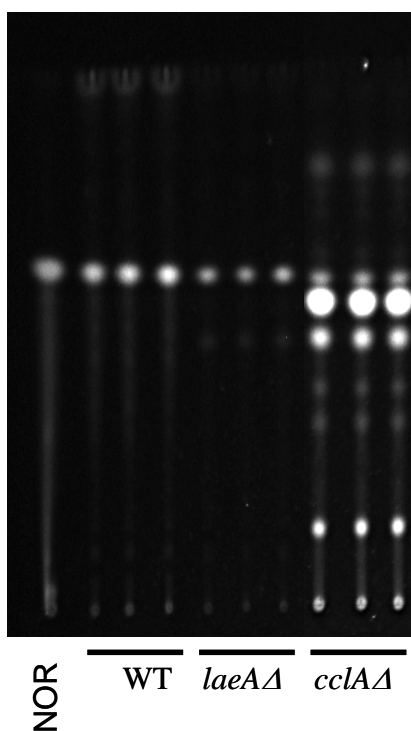

**Supplementary Figure 2.** Thin layer chromatography of chloroform extracts from three *A. nidulans* strains differing only in presence of *cclA* and *laeA*. All strains contain the allele *stcEA::argB* which results in the production of norsolorinic acid (**19**, NOR) instead of sterigmatocystin (**2**). NOR = norsolorinic acid standard, WT = RJW65, *laeA*Δ = RJW81.1, *cclA*Δ = RJW75.2.

### Supplementary Figure 3

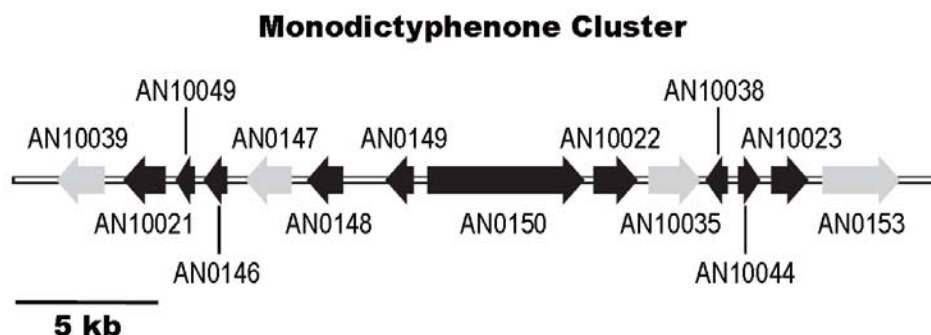

**Supplementary Figure 3.** Order of genes in the monodictyphenone gene cluster. The monodictyphenone PKS (AN0150, MdpG) contains starter unit ACP transacylase (SAT), ketosynthase (KS), acyltransferase (AT), product template (PT) and acyl carrier protein (ACP) domains as is typical for a NR-PKS. BLAST analysis indicates that AN0149 (MdpF) is a lactamase or hydrolase and that AN0147 (MdpD) is a monooxygenase (**Supplementary Table 1**). We propose that after polyketide formation by monodictyphenone PKS (MdpG), this polyketide is subsequently hydrolyzed from the PKS by the action of the hydrolase (AN0149, MdpF) to endocrocin-9-anthrone (**20**). AN0147 (MdpD) might be responsible for the oxidation of endocrocin-9-anthrone (**20**) to endocrocin (**21**). Endocrocin (**21**) is likely to decarboxylate spontaneously to form emodin (**10**). AN0147 (MdpD) might also oxidize emodin (**10**) to produce emodin analogs **11** – **13**. Emodin analog **14** may be derived from **13** by a transaminase activity (See Figure 1d). It should be noticed that AN0147 (MdpD) mRNA is not up-regulated during the time course studied. The endogenous level of AN0147 is possibly enough to catalyze all oxidation steps. However, the possibility that other monooxygenases not in the monodictyphenone cluster catalyzes the monodictyphenone pathway cannot be excluded. AN10049 (scytalone dehydratase), AN0146 (StcU homolog), AN10038 (StcT homolog), AN10044 (StcO homolog), and AN10023 (AflY homolog) might also be involved in catalyzing emodin (**10**) to form monodictyphenone (**9**)

## Supplementary Figure 4

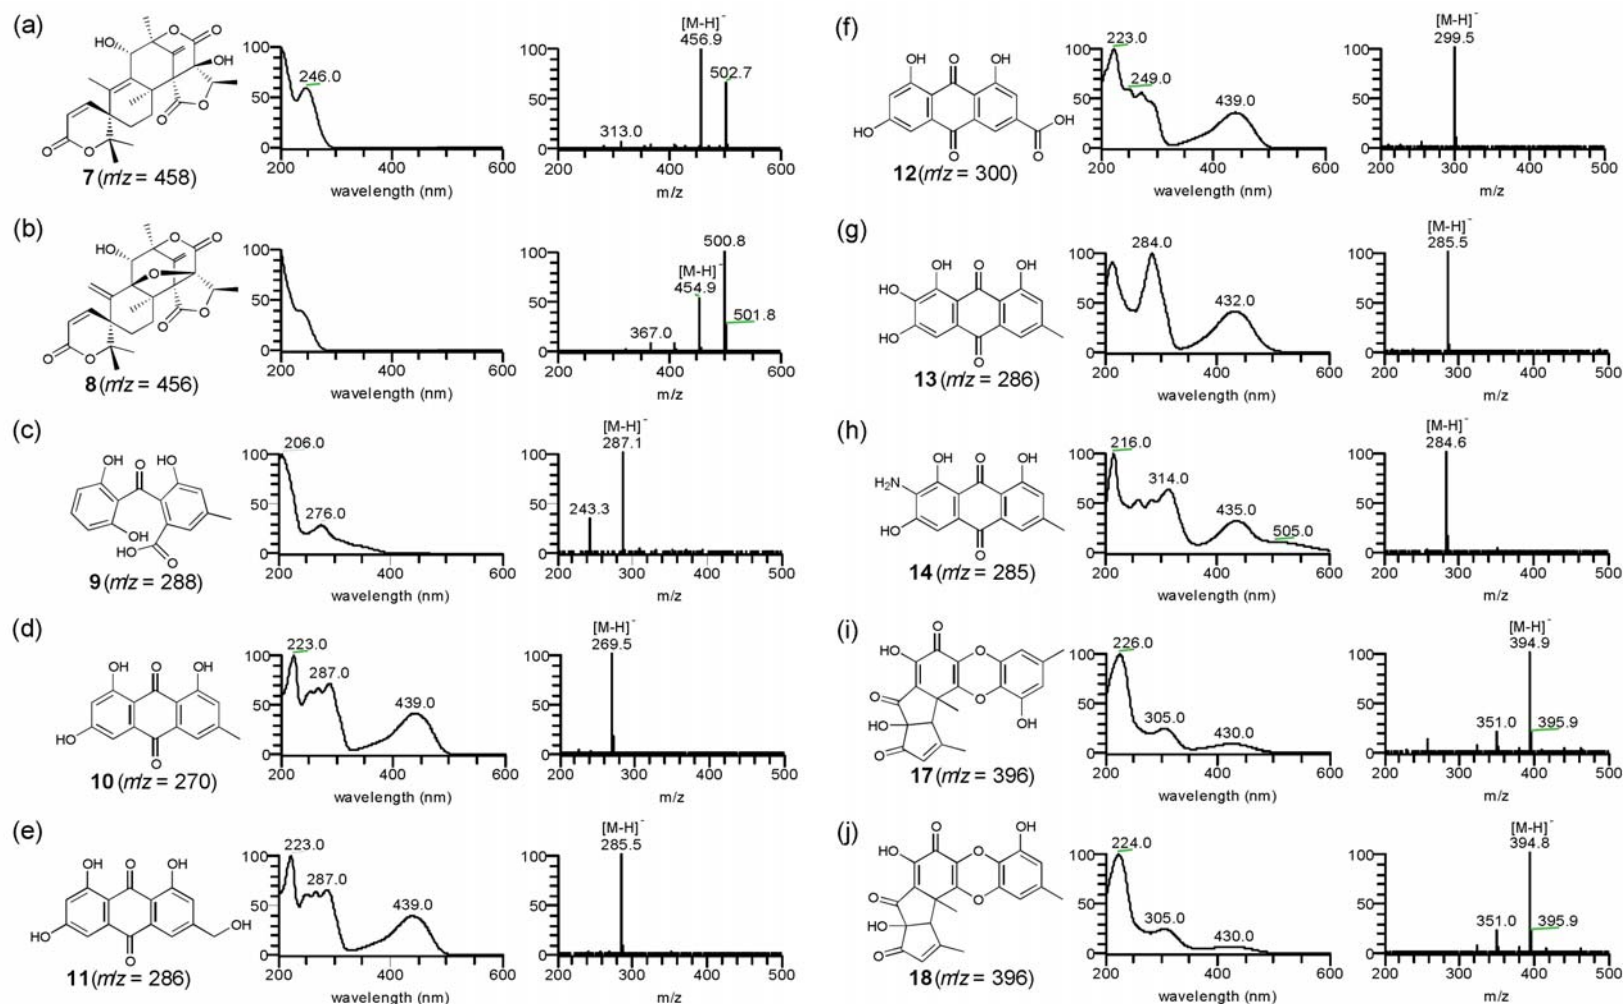

**Supplementary Figure 4.** UV/Vis and ESI-MS in negative mode of (a) austinol (**7**), (b) dehydroaustinol (**8**), (c) monodictyphenone (**9**), (d) emodin (**10**) (e)  $\omega$ -hydroxyemodin (**11**), (f) emodic acid (**12**), (g) 2-hydroxyemodin (**13**), (h) 2-aminoemodin (**14**), (i) F9775B (**17**), (j) F9775A (**18**).

**Supplementary Table 1.** Gene identities in two novel CclA regulated secondary metabolite gene clusters.

| Gene <sup>a</sup>        | Putative function <sup>b</sup>          | Highest Blast/E-value <sup>c</sup>              | Organism <sup>d</sup>                       |
|--------------------------|-----------------------------------------|-------------------------------------------------|---------------------------------------------|
| Monodictyphenone cluster |                                         |                                                 |                                             |
| AN10039                  | histidine acid phosphatase              | putative, 5e <sup>-151</sup>                    | <i>Aspergillus clavatus</i> NRRL1           |
| AN10021, mdpA            | regulatory gene                         | <i>aflJ</i> homolog, 3e <sup>-69</sup>          | <i>Aspergillus flavus</i>                   |
| AN10049, mdpB            | scytalone dehydratase                   | <i>scd1</i> , 7e <sup>-54</sup>                 | <i>Colletotrichum lagenarium</i>            |
| AN0146, mdpC             | versicolorin ketoreductase              | <i>stcU</i> homolog, 5e <sup>-96</sup>          | <i>Aspergillus nidulans</i>                 |
| AN0147, mdpD             | flavin-containing mono-oxygenase        | MAK1, 7e <sup>-79</sup>                         | <i>Nectria haematococca</i>                 |
| AN0148, mdpE             | regulatory gene                         | <i>aflR</i> homolog, 8e <sup>-34</sup>          | <i>Aspergillus flavus</i>                   |
| AN0149, mdpF             | Zn-dependent hydrolase                  | putative, 1e <sup>-119</sup>                    | <i>Neosartorya fischeri</i>                 |
|                          | metallo-beta-lactamase                  |                                                 |                                             |
| AN0150, mdpG             | polyketide synthase                     | putative, 0.0                                   | <i>Aspergillus</i> sp.                      |
| AN10022, mdpH            | DUF 1772 superfamily                    | putative, 3e <sup>-49</sup>                     | <i>Neosartorya fischeri</i>                 |
| AN10035, mdpI            | AMP binding, acyl-coA synthase          | putative, 4e <sup>-17</sup>                     | <i>Corynebacterium efficiens</i>            |
|                          | O-succinylbenzoic acid--CoA ligase      | putative, 2e <sup>-18</sup>                     | <i>Bacillus</i> sp.                         |
|                          | cinnamyl alcohol dehydrogenase          | putative, 2e <sup>-16</sup>                     | <i>Arabidopsis</i>                          |
| AN10038, mdpJ            | glutathione S transferase <sup>e</sup>  | <i>stcT</i> homolog, 2e <sup>-30</sup>          | <i>Aspergillus nidulans</i>                 |
| AN10044, mdpK            | oxidoreductase                          | <i>stcO</i> homolog, 3e <sup>-78</sup>          | <i>Aspergillus nidulans</i>                 |
| AN10023, mdpL            | Baeyer-Villiger oxidase                 | <i>aflY</i> , ( <i>stcR</i> ) 2e <sup>-83</sup> | <i>Aspergillus parasiticus</i>              |
| AN0153                   | MYB DNA binding protein                 | <i>trf1</i> homolog, 3e <sup>-33</sup>          | <i>Schizosaccharomyces pombe</i>            |
| F9775 cluster            |                                         |                                                 |                                             |
| AN7907                   | glyoxylate-bleomycin resistance protein | putative, 2e <sup>-24</sup>                     | <i>Xanthobacter autotrophicus</i>           |
| AN7908                   | a-L-arabinosidase                       | putative, 3e <sup>-140</sup>                    | <i>Aspergillus sojae</i>                    |
| AN7909                   | polyketide synthase                     | putative, 0.0                                   | <i>Aspergillus</i> spp. & <i>Ascomycete</i> |
| AN7910                   | hypothetical                            | predicted                                       |                                             |
| AN7911                   | amidohydrolase                          | putative, 7e <sup>-59</sup>                     | <i>Mycobacterium smegmatis</i>              |
| AN7912                   | tyrosinase                              | putative, 2e <sup>-62</sup>                     | <i>Aspergillus clavatus</i>                 |
| AN7913                   | hypothetical                            | predicted                                       |                                             |
| AN7914                   | alcohol dehydrogenase                   | <i>cipB</i> , 2e <sup>-69</sup>                 | <i>Pyrenophora tritici-repentis</i>         |
| AN7915                   | β-glucosidase 2                         | putative, 1e <sup>-127</sup>                    | <i>Pyrenophora tritici-repentis</i>         |
| AN7916                   | AA transporter                          | putative, 6e <sup>-77</sup>                     | <i>Aspergillus fumigatus</i>                |

<sup>a</sup> *A. nidulans* genome annotation ([http://www.broad.mit.edu/annotation/genome/aspergillus\\_nidulans/MultiHome.html](http://www.broad.mit.edu/annotation/genome/aspergillus_nidulans/MultiHome.html)).

<sup>b</sup> Putative function was based on BLAST search at NCBI and the putative domains were from the Pfam database.

<sup>c</sup> Best match from BLAST search at NCBI.

<sup>d</sup> Organism of best BLAST match.

<sup>e</sup> This gene also has homologies to translation elongation factor.

**Supplementary Table 2.** Fungal strains used in this study. For polyketide synthase deletions, multiple identical transformants were tested for secondary metabolite production. LO2154-LO2156 are, for example, sister transformants with the same genotype. AN0148::*AfpyrG-alcA*(p)-AN0148 is a replacement of the endogenous promoter of AN0148 with the *alcA* promoter and the *A. fumigatus pyrG* gene (*AfpyrG*). *AfpyrA* is the *A. fumigatus pyroA* gene and *AfriboB* is the *A. fumigatus riboB* gene.

| Strain                 | Genotype                                                                               | Source     |
|------------------------|----------------------------------------------------------------------------------------|------------|
| RJW33.1                | <i>wA3; argB2; metG1; stcE::argB, trpC801, laeA::metG, veA1</i>                        | This study |
| TJW73                  | <i>wA3; argB2; metG1; stcE::argB, trpC801, laeA::metG, veA1; cclA::pyroA</i>           | This study |
| RJW65                  | <i>stcE::argB; veA1</i>                                                                | This study |
| RJW75.2                | <i>cclA::pyroA; pyroA4; stcE::argB; veA1</i>                                           | This study |
| RJW76.1                | <i>cclA::pyroA; pyroA4; stcE::argB; laeA::metG, veA1</i>                               | This study |
| RJW81.1                | <i>stcE::argB; laeA::metG, veA1</i>                                                    | This study |
| LO2026                 | <i>pyrG89; pyroA4, nkuA::argB; riboB2, stcJ::AfriboB</i>                               | This study |
| LO2051                 | <i>pyrG89; pyroA4, nkuA::argB; riboB2, stcJ::AfriboB; cclA::AfpyrA</i>                 | This study |
| LO2149                 | <i>pyrG89; pyroA4, nkuA::argB; riboB2, stcJ::riboB; cclA::AfpyrA; AN0150::AfpyrG</i>   | This study |
| LO2154-LO2156          | <i>pyrG89; pyroA4, nkuA::argB; riboB2, stcJ::riboB; cclA::AfpyrA; AN0523::AfpyrG</i>   | This study |
| LO2159, LO2161, LO2163 | <i>pyrG89; pyroA4, nkuA::argB; riboB2, stcJ::riboB; cclA::AfpyrA; AN1034::AfpyrG</i>   | This study |
| LO2165-LO2167          | <i>pyrG89; pyroA4, nkuA::argB; riboB2, stcJ::riboB; cclA::AfpyrA; AN2032::AfpyrG</i>   | This study |
| LO2169, LO2170, LO2173 | <i>pyrG89; pyroA4, nkuA::argB; riboB2, stcJ::riboB; cclA::AfpyrA; AN3230::AfpyrG</i>   | This study |
| LO2174, LO2176, LO2177 | <i>pyrG89; pyroA4, nkuA::argB; riboB2, stcJ::riboB; cclA::AfpyrA; AN3386::AfpyrG</i>   | This study |
| LO2179-LO2181          | <i>pyrG89; pyroA4, nkuA::argB; riboB2, stcJ::riboB; cclA::AfpyrA; AN6000::AfpyrG</i>   | This study |
| LO2184-LO2186          | <i>pyrG89; pyroA4, nkuA::argB; riboB2, stcJ::riboB; cclA::AfpyrA; AN6448::AfpyrG</i>   | This study |
| LO2189-LO2191          | <i>pyrG89; pyroA4, nkuA::argB; riboB2, stcJ::riboB; cclA::AfpyrA; AN7071::AfpyrG</i>   | This study |
| LO2194                 | <i>pyrG89; pyroA4, nkuA::argB; riboB2, stcJ::riboB; cclA::AfpyrA; AN7909::AfpyrG</i>   | This study |
| LO2333                 | <i>pyrG89; pyroA4, nkuA::argB; riboB2, stcJ::riboB; AN0148::AfpyrG-alcA</i> (p)-AN0148 | This study |

**Supplementary Table 3.** Primers used in this study.

| Gene                            | Primer       | Sequence                                              |
|---------------------------------|--------------|-------------------------------------------------------|
| <i>stcJ</i>                     |              |                                                       |
| AN7815                          | LIZP575ES    | 5'AGCATGGTGTGACTCCAGC                                 |
|                                 | LIZP576ES    | 5'CAAAACGACAGTTGCAGGG                                 |
|                                 | LIZP577ES    | 5' <b>GACTCCTGAACGGCCTCTTT</b> AAGCGTCTTGGCTGGACC     |
|                                 | LIZP578ES    | 5' <b>TTCTGCAGCGCAAACGTTCT</b> CAACGGCTCCAGACATGTC    |
|                                 | LIZP579ES    | 5'TACCAGGAGCTGATACTACC                                |
|                                 | LIZP580ES    | 5'AAGTACTATGGGTCATCAAGC                               |
| <i>cclA</i>                     |              |                                                       |
| AN9399                          | Ccl5F        | 5'TCGTCCCATTTGATCCTCATTGAAC                           |
|                                 | Ccl5R        | 5'GCGAAAGCTTTGCGGATAGGTATTTACCCG                      |
|                                 | Ccl3F        | 5'GACCGGATCCTGAATGGGGTTGTACTTTCAGCTG                  |
|                                 | Ccl3R        | 5'TCGAGTATAACATCTCTGAACTCG                            |
|                                 | CclIF        | 5'ATCGCCAAACGGATGTTCTCTCC                             |
|                                 | CclIR        | 5'GACAAGCATTGCTTCGACCTCG                              |
|                                 | LIZP587ES    | 5'TCCTCATTGAACTTGCCTTCG                               |
|                                 | LIZP588ES    | 5'TCCGAAAATACATCTTCATCC                               |
|                                 | LIZP589ES    | 5' <b>GTAATCCAGCATCTGATGTCC</b> TTTGCGGATAGGTATTTACCC |
|                                 | LIZP590ES    | 5' <b>CTTCATTATGTAGACACTCGC</b> TGGGGTTGTACTTTCAGCTG  |
|                                 | LIZP591ES    | 5'CCTGGTGTCACTCCTTGG                                  |
|                                 | LIZP592ES    | 5'ACATCTCTGAACTCGCCCC                                 |
| <b>Monodictyphenone cluster</b> |              |                                                       |
| AN10039                         | 10039F       | 5'TTTCGCACTCCTGAGCCTTCTG                              |
|                                 | 10039R       | 5'CGCAGCTCTACGTTTCG ATTCTT                            |
|                                 | 10039_prom_F | 5'TTTCGGAACAGTAATACGCTCG                              |
|                                 | 10039_prom_R | 5'GGGATGCATTCTTCACGTTTC                               |
|                                 | 10039_ORF_F  | 5'TCCTTATCTGGTGGACAACGAC                              |
|                                 | 10039_ORF_R  | 5'GCCGACGGTAACAATCGAAG                                |
| AN10021                         | 10021F       | 5'TAGTCTATCCGACCTTGAAACCC                             |
|                                 | 10021R       | 5'GTAGCCACAAACACGACGACCT                              |
| AN10049                         | 10049F       | 5'ACGCTGCAGCCAACATTTGAAGG                             |
|                                 | 10049R       | 5'TCAGACGGACCTGACCTCAACC                              |
|                                 | 10049_prom_F | 5'GTCGTAGCCAGAACAATAAAATGGC                           |
|                                 | 10049_prom_R | 5'TGTGCCGTCCCTGTTTCTCTAC                              |
|                                 | 10049_ORF_F  | 5'GGTAACCCACTCCTCAAAACG                               |
|                                 | 10049_ORF_R  | 5'CAGTCCATCGTATATTTCGGTTC                             |
| AN0146                          | 0146F        | 5'CGAAGGCAAAGTTGCCCTTGTG                              |
|                                 | 0146R        | 5'GTGGGTGAACGGAAGATCATT                               |
| AN0147                          | 0147F        | 5'CATTGTTCATGCAGCCTTCTGCC                             |
|                                 | 0147R        | 5'GTGGAGGATTTGTTGGATGGTGA                             |
| AN0148                          | 0148F        | 5'TCTTCAGAGGGTCCAGGTATCC                              |
|                                 | 0148prom_F   | 5'CCCACTCTGGGCATCAGCTC                                |
|                                 | 0148prom_R   | 5'GATTGATATCGCCTCACTCCCACT                            |
|                                 | 0148_ORF_F   | 5'CCACGTCTATCAACAAAGATGATG                            |
|                                 | 0148_ORF_R   | 5'GAAGCAAGATAACCGTCGTAGTC                             |
|                                 | 0148R        | 5'CGCACAGCTAGTTCTCAGCGAA                              |
| AN0149                          | 0149F        | 5'TCAGCCGCAGCAGCATAAAGGC                              |
|                                 | 0149R        | 5'GCGAGGAGGTGTAAAACGATGG                              |
| AN0150                          | 0150F        | 5'TGATACTGACATGGTCGTCGCC                              |

|         |        |                           |
|---------|--------|---------------------------|
|         | 0150R  | 5'CGCCTTTACAGGTCAAGGTGCA  |
| AN10022 | 10022F | 5'AAAATTGCTCACAGCCTAGCAGG |
|         | 10022R | 5'CTAGAGTCGCTTCGGGACATCA  |
| AN10035 | 10035F | 5'AAATCGATGGTGGGCACCTACC  |
|         | 10035R | 5'CGATTGTTTCCGAAAGCGAGAGT |
| AN10038 | 10038F | 5'GTCATTCGGAACACTCTACACCC |
|         | 10038R | 5'GGGACTTGAGTTAGAGATTCCAG |
| AN10044 | 10044F | 5'AATACTGGCACGGCTCTGATCC  |
|         | 10044R | 5'GGGGTTGCATCGATTTCTGCCA  |
| AN10023 | 10023F | 5'TCTCTCAACCAAACCTCGGCCAG |
|         | 10023R | 5'GTGTACCCGAGCTTGATTTCGAA |
| AN0153  | 0153F  | 5'TTCAGAGCCAGTTTCTGTCTGC  |
|         | 0153R  | 5'GGGAAAGGAAGTCCATGGAGAG  |

#### F9775 cluster

|        |       |                           |
|--------|-------|---------------------------|
| AN7907 | 7907F | 5'ACTGAAAACAACCCACCTCCCC  |
|        | 7907R | 5'CACCTTGCCGAGATTGCGTCGA  |
| AN7908 | 7908F | 5'TGAGAAACCTCAGTACCTGGCC  |
|        | 7908R | 5'CGGCTACGACCTTCTGCCATAT  |
| AN7909 | 7909F | 5'AACGTCGTACAGCACTGGACAG  |
|        | 7909R | 5'AGAAGTCATCGACATTGAACCG  |
| AN7910 | 7910F | 5'CTACTGAGATTGCCGAGATCACC |
|        | 7910R | 5'GTGGTGCCGAGGATATAGTTGAA |
| AN7911 | 7911F | 5'AGAACACTACTACTCGACCGCC  |
|        | 7911R | 5'GGTGCATATGAAGAAGGAGCAGT |
| AN7912 | 7912F | 5'ATTTGCTGACCGGTTTGCCAGG  |
|        | 7912R | 5'CGAGCTGACAGTCTGCGATGAT  |
| AN7913 | 7913F | 5'AAGATCCTCGAGTACGACGGTC  |
|        | 7913R | 5'GAAACAGCGTCCTTGC GGAGAT |
| AN7914 | 7914F | 5'TGGCTCACCAAGGCAGGCAATG  |
|        | 7914R | 5'CCAAGCTGGTTGTGGAGTTGTAA |
| AN7915 | 7915F | 5'TTTAGCTCTAGTGTCCCTGGGG  |
|        | 7915R | 5'CGCAACACCGATCAGGACAATC  |
| AN7916 | 7916F | 5'GACTTGCTACAAACCCATCGGC  |
|        | 7916R | 5'CTCGAACCTGGTAAGAAAGACTC |

#### Polyketide synthases

|        |            |                                                           |
|--------|------------|-----------------------------------------------------------|
| AN0150 | AN0150.3P1 | 5'TGG TGT GAA TTC AGC TTT CG                              |
|        | AN0150.3P2 | 5'ACA TAT GGT CAT GCG AGT GC                              |
|        | AN0150.3P3 | 5' <b>CGAAGAGGGTGAAGAGCATTG</b> AAGTGACAAGCGTCAGATCG      |
|        | AN0150.3P4 | 5' <b>GCATCAGTGCCTCCTCTCAGACAG</b> CCCATCCTCACTCATCAA CC  |
|        | AN0150.3P5 | 5'TTG ACT GAA CCC TGC TAG GC                              |
|        | AN0150.3P6 | 5'TAC TGG AAG CGC TGA TAT GC                              |
| AN0523 | AN0523.3P1 | 5'TCC GAG GTA GAA ATC GTT GG                              |
|        | AN0523.3P2 | 5'CAG TGG GTT GAC TCT GTT GC                              |
|        | AN0523.3P3 | 5' <b>CGAAGAGGGTGAAGAGCATTG</b> AAGGATTGTCCGGCTTATGG      |
|        | AN0523.3P4 | 5' <b>GCATCAGTGCCTCCTCTCAGACAG</b> GTCCAGTAAGGCCAAGTT CG  |
|        | AN0523.3P5 | 5'GAA TGA GGG CTG GTT ACT GG                              |
|        | AN0523.3P6 | 5'GAT CTG CGA AGA CTG GAA GG                              |
| AN1034 | AN1034.3P1 | 5'CAC CCG CTT CCT TAC TAT GC                              |
|        | AN1034.3P2 | 5'GCT TGA GAA GGT CCA GAA CG                              |
|        | AN1034.3P3 | 5' <b>CGAAGAGGGTGAAGAGCATTG</b> ATTGGAGCCGGAGATTAAGG      |
|        | AN1034.3P4 | 5' <b>GCATCAGTGCCTCCTCTCAGACAG</b> CCCTAACCAGCTCCAGTGA CC |
|        | AN1034.3P5 | 5'CCT GTT TCG TAC CCA ATT CC                              |
|        | AN1034.3P6 | 5'TGA TAA TGC GGA CAG AGA CG                              |
| AN2032 | AN2032.3P1 | 5'GAC TGA AAC CCT GGA ACA CC                              |

|        |            |                                                            |
|--------|------------|------------------------------------------------------------|
|        | AN2032.3P2 | 5'CTT CGA CCG TCA TCC TAT CG                               |
|        | AN2032.3P3 | 5' <u>CGAAGAGGGTGAAGAGCATTG</u> TGAAGGCTGAACATGCTAGG       |
|        | AN2032.3P4 | 5' <u>GCATCAGTGCCTCCTCTCAGACAG</u> CCTCGGAAGGTACAATGT GG   |
|        | AN2032.3P5 | 5'CCA TGG ACA TGC ACT GTA GG                               |
|        | AN2032.3P6 | 5'TCT GTT GGA CCA CTG TCT CG                               |
| AN3230 | AN3230.3P1 | 5'GCA TCT TGC AGG GTT CTA CC                               |
|        | AN3230.3P2 | 5'ACA TTC ACC AAG CTG GTT CC                               |
|        | AN3230.3P3 | 5' <u>CGAAGAGGGTGAAGAGCATTG</u> TGGATTACGTCCAGCTAGGG       |
|        | AN3230.3P4 | 5' <u>GCATCAGTGCCTCCTCTCAGACAG</u> AAGCCAGATGGGACAATA CG   |
|        | AN3230.3P5 | 5'CGT CTA TGC AGT CGT GTT CC                               |
|        | AN3230.3P6 | 5'ATC AAG ATT CGG GAG ACA CG                               |
| AN3386 | AN3386.3P1 | 5'GTT GAT GTT CGC TCG TAT CG                               |
|        | AN3386.3P2 | 5'TGC TTG AGT CGA TCA CTT GG                               |
|        | AN3386.3P3 | 5' <u>CGAAGAGGGTGAAGAGCATTG</u> ACCTCTCACCGAGACTTTGC       |
|        | AN3386.3P4 | 5' <u>GCATCAGTGCCTCCTCTCAGACAG</u> ACATCCCCACTGTCATTT CG   |
|        | AN3386.3P5 | 5'CCT GTG TGA TTG GAC TGT GG                               |
|        | AN3386.3P6 | 5'AAG CGG GTT GTT TGT TAT CG                               |
| AN6000 | AN6000.3P1 | 5'TTT TAT CCG GAA GGT CAT CG                               |
|        | AN6000.3P2 | 5'TCT TCC ACC ACC GAG TAT CC                               |
|        | AN6000.3P3 | 5' <u>CGAAGAGGGTGAAGAGCATTG</u> GTTCAATGAGGGCAAAATGC       |
|        | AN6000.3P4 | 5' <u>GCATCAGTGCCTCCTCTCAGACAG</u> TCAATTCATTTTCGATGGT TCC |
|        | AN6000.3P5 | 5'AGA TGG TGG GTG AGT CAA GG                               |
|        | AN6000.3P6 | 5'GAG CTG TCA CTA CGC TCT GC                               |
| AN6448 | AN6448.3P1 | 5'CAG ATG CGG TGT AGA TGT CG                               |
|        | AN6448.3P2 | 5'TGG ATT GAG CAG AGA CAA CG                               |
|        | AN6448.3P3 | 5' <u>CGAAGAGGGTGAAGAGCATTG</u> GAGGCAGGACAAAACACAGG       |
|        | AN6448.3P4 | 5' <u>GCATCAGTGCCTCCTCTCAGACAG</u> TATGTTGCCTGCATTTTCAGC   |
|        | AN6448.3P5 | 5'CAC CGG GAG TCA ATA CAT GG                               |
|        | AN6448.3P6 | 5'CCG TTG TGC ATG ATT TCT CC                               |
| AN7071 | AN7071.3P1 | 5'CTT GCT GGA GGA AGA GAA CG                               |
|        | AN7071.3P2 | 5'TGG CTA CAG TGT TGC TGA GG                               |
|        | AN7071.3P3 | 5' <u>CGAAGAGGGTGAAGAGCATTG</u> CCCAGCTGGCTTATACTTGG       |
|        | AN7071.3P4 | 5' <u>GCATCAGTGCCTCCTCTCAGACAG</u> CGGAAGTGAGGGAGTGTA GC   |
|        | AN7071.3P5 | 5'CCT GCA TCC TAC AGG TAG CC                               |
|        | AN7071.3P6 | 5'CCC AGC TGA ATC AGA ACT CC                               |
| AN7079 | AN7079.3P1 | 5'CAT GAC AAA GGC CAT ACA GC                               |
|        | AN7079.3P2 | 5'GGA AAG GAG CAT ACC AGT CG                               |
|        | AN7079.3P3 | 5' <u>CGAAGAGGGTGAAGAGCATTG</u> GTTGATGTCAGCCCAGAAGC       |
|        | AN7079.3P4 | 5' <u>GCATCAGTGCCTCCTCTCAGACAG</u> CAGGTATAATGTGCACGT CTCC |
|        | AN7079.3P5 | 5'GAG GAT CCA GAC ATC CTT GG                               |
|        | AN7079.3P6 | 5'CAG GTA GGA AAA TGC AGT AGG G                            |

-----

Underlined sequences show the placement of restriction sites *Hind*III (Br5R) & *Bam*HI (Br3F).  
Blue and red sequences are tails that anneal to the *A. fumigatus pyrG* fragment (Afp<sub>pyrG</sub>)  
during fusion PCR.

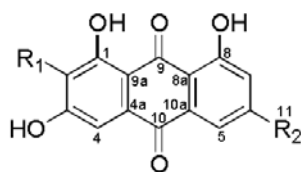

- 10**  $R_1 = H, R_2 = CH_3$   
**11**  $R_1 = H, R_2 = CH_2OH$   
**12**  $R_1 = H, R_2 = COOH$   
**13**  $R_1 = OH, R_2 = CH_3$   
**14**  $R_1 = NH_2, R_2 = CH_3$

**Supplementary Table 4.** NMR data for compounds **10** – **14** (400 and 100 MHz in DMSO- $d_6$ )

|                   | <b>11</b>             | <b>12</b>  | <b>13</b>             | <b>14</b>               | <b>10</b>                     |
|-------------------|-----------------------|------------|-----------------------|-------------------------|-------------------------------|
| position          | $\delta_C$            | $\delta_C$ | $\delta_C$            | $\delta_C$              | $\delta_H$                    |
| 1                 | 166.0, qC             | 166.5, qC  | 151.4, qC             | 148.7 <sup>a</sup> , qC | —                             |
| 1-OH              | —                     | —          | —                     | —                       | 12.07 <sup>a</sup> (1H, br s) |
| 2                 | 108.0, CH             | 108.0, CH  | 139.2, qC             | 131.8, qC               | —                             |
| 2-NH <sub>2</sub> | —                     | —          | —                     | —                       | 5.51 (2H, br s)               |
| 3                 | 164.5, qC             | 164.8, qC  | 152.5, qC             | 148.6 <sup>a</sup> , qC | —                             |
| 3-OH              | —                     | —          | —                     | —                       | 11.12 (1H, s)                 |
| 4                 | 109.1, CH             | 109.4, CH  | 109.3, CH             | 108.6, CH               | 7.27 (1H, s)                  |
| 4a                | 135.1, qC             | 133.4, qC  | 124.6, qC             | 120.8, qC               | —                             |
| 5                 | 117.1, CH             | 135.0, CH  | 120.1, CH             | 120.0, CH               | 7.42 (1H, s)                  |
| 6                 | 152.9, qC             | 138.4, qC  | 148.2, qC             | 148.3 <sup>a</sup> , qC | —                             |
| 7                 | 120.8, CH             | 124.2, CH  | 123.4, CH             | 123.0, CH               | 7.06 (1H, s)                  |
| 8                 | 161.5, qC             | 161.1, qC  | 161.3, qC             | 161.3, qC               | —                             |
| 8-OH              | —                     | —          | —                     | —                       | 12.01 <sup>a</sup> (1H, br s) |
| 8a                | 114.1, qC             | 118.2, qC  | 113.4, qC             | 113.5, qC               | —                             |
| 9                 | 189.7, qC             | 189.1, qC  | 190.4, qC             | 191.1, qC               | —                             |
| 9a                | 108.9, qC             | 109.1, qC  | 109.7, qC             | 109.5, qC               | —                             |
| 10                | 181.5, qC             | 180.9, qC  | 180.4, qC             | 179.7, qC               | —                             |
| 10a               | 132.9, qC             | 118.9, qC  | 133.0, qC             | 133.8, qC               | —                             |
| 11                | 62.0, CH <sub>2</sub> | 165.6, qC  | 21.6, CH <sub>3</sub> | 21.6, CH <sub>3</sub>   | 2.38 (3H, s)                  |

<sup>a</sup> Values bearing the same superscript in the same column may be interchanged.

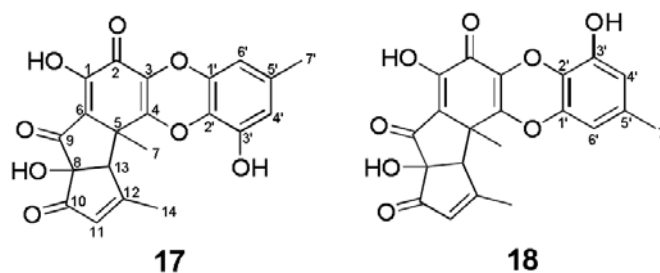

**Supplementary Table 5.** NMR data for compound **17** and **18** (400 and 100 MHz in DMSO-*d*<sub>6</sub>)

|          | <b>17</b>  |                 | <b>18</b>  |                 |
|----------|------------|-----------------|------------|-----------------|
| position | $\delta_C$ | $\delta_H$      | $\delta_C$ | $\delta_H$      |
| 1        | 148.8      | —               | 148.1      | —               |
| 2        | 174.6      | —               | 174.4      | —               |
| 3        | 130.9      | —               | 131.3      | —               |
| 4        | 155.1      | —               | 154.4      | —               |
| 5        | 44.1       | —               | 43.9       | —               |
| 6        | 118.9      | —               | 119.2      | —               |
| 7        | 29.0       | 1.76 (3H, s)    | 28.6       | 1.74 (3H, s)    |
| 8        | 87.3       | —               | 87.2       | —               |
| 8-OH     | —          | 6.75 (1H, s)    | —          | 6.84 (1H, s)    |
| 9        | 194.2      | —               | 194.6      | —               |
| 10       | 199.7      | —               | 199.4      | —               |
| 11       | 131.4      | 6.05 (1H, br s) | 131.6      | 6.07 (1H, br s) |
| 12       | 174.9      | —               | 174.9      | —               |
| 13       | 59.3       | 3.46 (1H, s)    | 59.4       | 3.36 (1H, s)    |
| 14       | 19.4       | 2.23 (3H, s)    | 19.6       | 2.24 (3H, s)    |
| 1'       | 141.5      | —               | 139.8      | —               |
| 2'       | 125.8      | —               | 127.4      | —               |
| 3'       | 145.4      | —               | 145.6      | —               |
| 3'-OH    | —          | 9.92 (1H, s)    | —          | 10.0 (1H, s)    |
| 4'       | 113.5      | 6.42 (1H, br s) | 114.6      | 6.46 (1H, br s) |
| 5'       | 135.4      | —               | 133.8      | —               |
| 6'       | 107.4      | 6.29 (1H, br s) | 107.4      | 6.39 (1H, br s) |
| 7'       | 20.7       | 2.13 (3H, s)    | 20.5       | 2.14 (3H, s)    |

## Supplementary Methods

### Strains.

**Supplementary Table 2** lists all of the fungal strains used for this study. Some strains are not discussed in the text but were used for sexual crosses to obtain the strains of interest. All strains were maintained as silica or glycerol stocks and were grown at 37°C on glucose minimal medium (GMM) <sup>1</sup> or solid YAG plates (5 g/l yeast extract, 15 g/l agar, 20 g/l *d*-glucose, and 1 ml/l trace element solution). All media contained appropriate supplements to maintain auxotrophs.

### Gene deletions or *alcA* promoter exchange of *cclA* (AN9399), *stcJ* (AN7815), *mdpG* (AN0150), *mdpE* (AN0148), AN7909 and other polyketides.

All genes are designated by using the Broad Institute designations (AN numbers). All primers are listed on **Supplementary Table 3**.

***cclA*:** *Aspergillus nidulans cclA* was disrupted in the wild-type strain RJW33.1 by replacement of *cclA* with the *A. nidulans pyroA* marker gene obtained from plasmid p14 <sup>2</sup>. An *A. nidulans cclA* gene disruption vector, pJW81.6, was constructed by insertion of a 1 kb DNA fragment upstream of the *cclA* start codon (primers Ccl5F and Ccl5R) and a 1 kb DNA fragment downstream of the *cclA* stop codon (primers Ccl3F and Ccl3R) on either side of the *pyroA* marker gene (*Hind*III and *Bam*HI). Fungal protoplasts were transformed by the polyethylene glycol method as previously described <sup>3</sup>. Homologous single-gene replacement of *cclA* was confirmed by Southern blot analysis. One of the resultant deletants, TJW73, was crossed with RJW65 to generate RJW75.2.

***stcJ/cclA* double mutant:** *stcJ* was replaced with the *A. fumigatus riboB* gene (*AfriboB*) <sup>4</sup> as follows. A linear construct consisting of *AfriboB* flanked by 1000 bp upstream of the *stcJ* coding sequence and 1000 bp downstream of the *stcJ* coding sequence was generated by fusion PCR using the protocol of Szewczyk *et al.* <sup>5</sup>. The construct was transformed into strain TN02A7 <sup>4</sup> using the procedures of Szewczyk *et al.* <sup>5</sup>. Four transformants were chosen and all were determined by diagnostic PCR and Southern hybridizations to have a correct replacement of *stcJ* with *AfriboB* and no heterologous integration of transforming DNA. Metabolite profiles revealed that these transformants did not produce sterigmatocystin (2). One of these

transformants, LO2026, was chosen for deletion of *cclA*. *cclA* was replaced with *A. fumigatus pyroA*<sup>4</sup> using the same approach and procedures as were used for the *stcJ* replacement. Four transformants were analyzed by diagnostic PCR and Southern hybridizations. All had a correct replacement of *cclA* with *AfpyroA*, but one had an additional heterologous integration. All of the three correct transformants showed similar metabolite profiles and one of them (LO2051) was used for subsequent experiments.

**Deletion of polyketide synthase genes:** The aromatic nature of monodictyphenone (**9**), emodin (**10**) and related compounds (**11 – 14**), and F9775A (**18**) and B (**17**) suggested that these compounds should be catalyzed by nonreduced fungal type I PKSs. Non-reduced (NR) type I PKSs contains the minimally necessary ketosynthase (KS), acyltransferase (AT), and acyl carrier protein (ACP) domains. Highly reduced (HR) type I PKSs contain additional modification domains such as methylation (CMe), ketoreductase (KR), enoylreductase (ER) and/or dehydratase (DH). We analyzed and grouped the 27 PKSs in *A. nidulans* into NR PKS and HR PKS by examining the PKS domain structure using the bioinformatic tools provided by the MIT Broad Institute ([http://www.broad.mit.edu/annotation/genome/aspergillus\\_group/MultiHome.html](http://www.broad.mit.edu/annotation/genome/aspergillus_group/MultiHome.html)). The genes targeted were AN0150, AN0523, AN1034, AN2032, AN3230, AN3386, AN6000, AN6448, AN7071, and AN7909. These ten NR-PKS genes were selected because they encompass every NR-PKS in the *A. nidulans* genome where the products are still unknown. All ten NR-PKS were disrupted by replacement, in LO2051, with the *A. fumigatus pyrG* gene (*AfpyrG*)<sup>6</sup> using the same approach and procedures as for *stcJ* and *cclA*. Mutants were examined for lack of production of the compounds in question. The relevant deletants were AN0150 $\Delta$  (*mdpG* $\Delta$ ) for emodin (**10**) and related molecules (**11 – 14**), and AN7909 $\Delta$  deletants for F9775A (**18**) and B (**17**).

Diagnostic PCR of the deletant and wild type strains was performed using the external primers used in the first round of the PCR. The difference in the sizes between the gene replaced by the selective marker and the native gene allowed the determination of correct gene replacement. In cases when the sizes of both the wild-type and deletant products were similar, diagnostic PCR was performed using one of the external primers and a primer located inside the marker gene. In

those cases, the deletant gave the PCR product of the expected size whereas no product was present in non-deletants.

***stcJ/cclA/mdpG(AN0150) triple mutant:*** LO2051 was chosen for deletion of *mdpG* (AN0150). *mdpG* was replaced with *Afp<sub>pyrG</sub>* using the same approach and procedures as were used for the *stcJ* replacement. Five transformants were analyzed by diagnostic PCR. All had a correct replacement of *mdpG* with *Afp<sub>pyrG</sub>*. All three correct transformants showed similar metabolite profiles and one of them (LO2149) was used for subsequent experiments.

***Over expression mdpE (AN0148) mutant:*** LO2026 was used for over expression of *mdpE* (AN0148). 153 bp upstream of the start codon were replaced with *Afp<sub>pyrG</sub>* followed by a 401 bp fragment containing the *A. nidulans alcA* promoter <sup>7</sup> using the procedure of Szewczyk *et al.*<sup>5</sup>.

***stcJ/cclA/AN7909 triple mutant:*** LO2051 was chosen for deletion of AN7909. AN7909 was replaced with *Afp<sub>pyrG</sub>* using the same approach and procedures as were used for the *stcJ* replacement. Three transformants were analyzed by diagnostic PCR. All had a correct replacement of AN7909 with *Afp<sub>pyrG</sub>*. All three transformants showed similar metabolite profiles and one of them (LO2194) was used for subsequent experiments.

### **Nucleic Acid Manipulations.**

The extraction of DNAs from fungi and bacteria, restriction enzyme digestion, gel electrophoresis, blotting, hybridization, and probe preparation were performed by standard methods <sup>8</sup>. *Aspergillus* DNA for diagnostic PCR was isolated using the method of Lee and Taylor (1990)<sup>9</sup>. RNA was extracted from *Aspergillus* strains by use of Trizol reagent (Invitrogen) according to the manufacturer's instructions. RNA blots were hybridized with 1 kb primers amplified by PCR for AN10039, AN10021, AN10049, AN0146, AN0147, AN0148, AN0149, AN0150, AN10022, AN10035, AN10038, AN10044, AN10023, AN0153, AN7907, AN7908, AN7909, AN7910, AN7911, AN7911, AN7912, AN7913, AN7914, AN7915, and AN7916 using primers listed on **Supplementary Table 3**.

### **ChIP coupled to quantitative PCR analysis.**

ChIP was carried out as described previously<sup>10</sup>. Antibodies used for ChIP were from Abcam: rabbit polyclonal to human C-terminus Histone H3 antibody (AB1791), rabbit polyclonal to Histone H3-tri methyl K9 (AB8898), rabbit monoclonal to Histone H3-di methyl K4 (AB32356), mouse monoclonal to Histone H3-tri methyl K4 (AB1229), and from Upstate Biotechnology, rabbit polyclonal to histone H3 acetyl K9-K14 (06-599). 2 µl of antibody were used per reaction of 200 µg total protein.

Wild type and *cclAΔ* were grown for 24 and 48 hr as above. Amplification and detection of precipitated DNA in real-time quantitative PCR was performed with Platinum SYBR Green qPCR SuperMix UDG (Invitrogen) following the instructions of the provider. The relative amounts of DNA were calculated by dividing the immunoprecipitated DNA by the input DNA. Each PCR reaction was replicated. To normalize the amount of DNA precipitated with the antibodies recognizing histone H3 modifications (H3K4me2, H3K4me3, H3K9me2/3, H3K9acK14ac), the resulting ratio of the precipitation with these antibodies was divided by the precipitate:input ratio of the antibody recognizing the H3 C-terminal tail. The resulting numbers represent the relative level of H3 modification and are expressed as relative DNA amounts (**Supplementary Fig. 1**). Two biological repeats were performed for each condition and standard deviation was calculated upon these.

To amplify the promoter and ORF regions of AN0148, AN10039 and AN10049 the primers listed on **Supplementary Table 3** were used.

### **Fermentation and LC/MS analysis.**

*Aspergillus nidulans* controls and deletant strains were cultivated at 37°C on solid YAG plates at  $22.5 \times 10^6$  spores/15 cm plate (~ 40 ml medium/plate) with required supplements. After 5 days, agar was chopped into small pieces, and the material was extracted with 50 ml of MeOH, followed by 50 ml of 1:1 CH<sub>2</sub>Cl<sub>2</sub>/MeOH, with each sonicated for 1 hr. The combined extracts were evaporated *in vacuo* to yield a residue, which was suspended in H<sub>2</sub>O (50 ml) and partitioned with ethyl acetate (50 ml × 2). The combined EtOAc layers were evaporated *in vacuo*, re-dissolved in MeOH (1 mg/ml) and injected with 10 µL for HPLC-DAD-MS analysis. LC/MS was carried out in negative mode using a ThermoFinnigan LCQ Advantage ion trap mass

spectrometer with an RP C<sub>18</sub> column (Alltech Prevail C18 3  $\mu$ m 2.1  $\times$  100mm) at a flow rate of 125  $\mu$ L/min. The solvent gradient for HPLC was 95% MeCN/H<sub>2</sub>O (solvent B) in 5% MeCN/H<sub>2</sub>O (solvent A), both containing 0.05% formic acid: 0% B from 0 to 5 min, 0 to 100% B from 5 to 35 min, maintained at 100% B from 35 to 40 min, 100 to 0% B from 40 to 45 min, and re-equilibration with 0% B from 45 to 50 min. Conditions for MS included a capillary voltage 5.0 kV, a sheath gas flow rate at 60 arbitrary units, an auxiliary gas flow rate at 10 arbitrary units, and the ion transfer capillary temperature at 350°C.

For *alcA*(p) inducing conditions,  $50 \times 10^6$  spores of strain LO2333 (**Supplementary Table 2**) was grown in 50 ml liquid LMM medium (15 g/l lactose instead of 10 g/l glucose in GMM medium) supplemented with pyridoxine (0.5 mg/l) at 37°C with shaking at 200 rpm. Cyclopentanone at a final concentration of 30 mM was added to the medium after 18 hr of inoculation. Culture medium was collected 48 hr after cyclopentanone induction by filtration and extracted with the same volume of EtOAc twice. The combined EtOAc layers were evaporated *in vacuo* and analyzed by HPLC-DAD-MS as described above.

#### Isolation and identification of secondary metabolites.

For structural elucidation, 20 YAG plates inoculated with wild-type *A. nidulans* were grown for 5 days at 37°C and extracted with EtOAc as described above. The crude extract was applied to a SiO<sub>2</sub> gel column (Merck 230-400 mesh, ASTM) and eluted with CHCl<sub>3</sub>-MeOH mixtures of increasing polarity (fraction A, 1:0, 300 ml; fraction B, 19:1, 300 ml; fraction C, 9:1, 300 ml; fraction D, 7:3, 300 ml). Fraction B was further purified by normal phase HPLC [Phenomenex Luna 5  $\mu$ m Si (2), 250  $\times$  10 mm] with a flow rate of 5.0 ml/min and measured by a UV detector at 254 nm using isocratic 1:1 ethyl acetate/hexane to afford austinol (**7**, 16.2 mg  $t_R$  = 9.4 min) and dehydroaustinol (**8**, 24.7 mg,  $t_R$  = 8.5 min).

Twenty-five YAG plates inoculated with double *stcJΔ*, *cclAΔ* *A. nidulans* (LO2051, **Supplementary Table 2**) were used to purify monodictyphenone (**9**), emodin and its derivatives (**10** – **14**) as described above. The crude extract was applied to a COSMOSIL 75C<sub>18</sub>-OPN reverse phase gel (Nacalai USA) and eluted with H<sub>2</sub>O-MeCN mixtures of decreasing polarity (fraction A, 1:9, 500 ml; fraction B, 3:7, 500 ml; fraction C, 7:3, 500 ml; fraction D, 0:1, 500 ml).

Fraction A, which contained monodictyphenone (**9**), was further purified by reverse phase HPLC [Phenomenex Luna 5 $\mu$ m C18 (2), 250  $\times$  21.2 mm] with a flow rate of 10.0 ml/min and measured by a UV detector at 254 nm. The gradient system was MeCN (solvent B) in 5 % MeCN/H<sub>2</sub>O (solvent A) both containing 0.05 % TFA: 20 to 45 % B from 0 to 25 min, 45 to 100% B from 25 to 26 min, maintained at 100 % B from 26 to 31 min, 100 to 20% B from 31 to 32 min, and re-equilibration with 20 % B from 32 to 37 min. Monodictyphenone (**9**, 3.2 mg) eluted at 17.3 min. Fractions B and C, which contained emodin and its derivatives (**10** – **14**), were combined and purified by reverse phase HPLC [Phenomenex Luna 5 $\mu$ m C18 (2), 250  $\times$  10 mm] with a flow rate of 5.0 ml/min and measured by a UV detector at 254 nm. The gradient system was MeCN (solvent B) in 5 % MeCN/H<sub>2</sub>O (solvent A) both containing 0.05 % TFA: 30 to 60 % B from 0 to 25 min, 60 to 100% B from 25 to 26 min, maintained at 100 % B from 26 to 31 min, 100 to 30% B from 31 to 32 min, and re-equilibration with 30 % B from 32 to 37 min.  $\omega$ -Hydroxyemodin (**11**, 25.5 mg), emodic acid (**12**, 18.6 mg), 2-hydroxyemodin (**13**, 46.8 mg), 2-aminoemodin (**14**, 26.0 mg), and emodin (**10**, 48.3 mg) were eluted at 10.8, 12.5, 15.2, 20.0, and 25.0 min, respectively. In some cases, TFA could not be removed from evaporation and was removed by elution of compound through COSMOSIL 75C<sub>18</sub>-OPN reverse phase gel (Nacalai USA).

One liter of Czapek's medium (30 g/l sucrose, 1 g/l K<sub>2</sub>HPO<sub>4</sub>, 0.5 g/l KCl, 3 g/l NaNO<sub>3</sub>, 0.5 g/l MgSO<sub>4</sub>·7H<sub>2</sub>O, 0.01 g/l FeSO<sub>4</sub>·7H<sub>2</sub>O) supplemented with pyridoxine (0.5 mg/l), uracil (1 mg/ml) and uridine (10 mM) was inoculated with 1000  $\times$  10<sup>6</sup> spores of *stcJΔ A. nidulans* (LO2026, **Supplementary Table 2**). This was then aliquoted to 20 of 125 ml flasks and grown at 37°C with shaking at 200 rpm. After 4 days, culture medium was collected by filtration and acidified to pH = 2 followed by EtOAc extraction twice. The crude extract was applied to a COSMOSIL 75C<sub>18</sub>-OPN reverse phase gel (Nacalai USA) and eluted with H<sub>2</sub>O-MeOH mixtures of decreasing polarity (fraction A, 7:3, 100 ml; fraction B, 1:1, 100 ml; fraction C, 0:1, 50 ml). Fraction A which contained F9775B (**17**) and A (**18**) was further purified by reverse phase HPLC [Phenomenex Luna 5  $\mu$ m C18 (2), 250  $\times$  21.2 mm] with a flow rate of 10.0 ml/min and measured by a UV detector at 254 nm. The gradient system was MeCN (solvent B) in 5 % MeCN/H<sub>2</sub>O (solvent A) both containing 0.05 % TFA: 30 to 70 % B from 0 to 20 min, 70 to 100% B from 20 to 21 min, 100 to 30% B from 21 to 22 min, and re-equilibration with 30 % B from 22 to 27 min. F9775B (**17**, 5.0 mg) and A (**18**, 4.2 mg) were eluted at 11.5 and 13.3 min, respectively.

### Compound identification.

All compounds were characterized mainly by NMR (**Supplementary Tables 4 and 5**), UV and Mass (**Supplementary Figure 4**) spectroscopic methods, as well as comparison of the spectra data with literature values. Compound **14** has the molecular formula of  $C_{15}H_{11}NO_5$  based on the high-resolution time-of-flight mass spectrometry (HRTOFMS) and  $^{13}C$  NMR data (**Supplementary Table 4**). The  $^1H$  NMR data of compound **14** were similar to those of 2-hydroxyemodin (**13**). The only difference was an addition of two  $D_2O$  exchangeable protons ( $\delta_H$  5.51) in compound **14**. These data suggest that one of the phenol hydroxyl groups in 2-hydroxyemodin (**13**) is replaced by aniline amino group in compound **14**.  $^{13}C$  NMR data suggest the aniline amino group should locate either to C-1, C-2, or C-3 since the chemical shifts of carbons on the ring C are almost identical between **13** and **14** (**Supplementary Table 4**). An upshift of C-2 from  $\delta_C$  139.2 in **13** to  $\delta_C$  131.8 in **14** suggests the aniline amino group locates to C-2. 2D NMR (gHMQC and gHMBC) spectral data also confirmed the assigned structure. Thus, compound **14** was identified as 2-aminoemodin.

Optical rotations were measured on a JASCO P-1010 digital polarimeter, IR spectra were recorded on a Perkin–Elmer 983G spectrophotometer. NMR spectra, detailed in supplementary data, were run on a Varian Mercury Plus 400 spectrometer, and HRESIMS spectrum was obtained on Waters LCT Premier XE electrospray time-of-flight mass spectrometer.

### Compound spectral data.

**Austinol (7)**: colorless solid;  $[\alpha]_D^{23} +218.7^\circ$  (MeOH, c 0.1); IR (ZnSe)  $cm^{-1}$  3368, 1778, 1726, 1688, 1538, 1292, 1217; For UV and ESI-MS data, see **Supplementary Figure 4**;  $^1H$  and  $^{13}C$  NMR data, in good agreement with the published data <sup>11</sup>.

**Dehydroaustinol (8)**: colorless solid;  $[\alpha]_D^{23} +321.5^\circ$  (MeOH, c 0.1); IR (ZnSe)  $cm^{-1}$  3400, 1748, 1711, 1378, 1275, 1119, 1065; For UV and ESI-MS data, see **Supplementary Figure 4**;  $^1H$  and  $^{13}C$  NMR data, in good agreement with the published data <sup>12</sup>.

**Monodictyphenone (9)**: yellow powder, IR (ZnSe)  $cm^{-1}$  3421, 1682, 1644, 1608, 1400, 1206, 1139; For UV and ESI-MS data, see **Supplementary Figure 4**;  $^1H$  and  $^{13}C$  NMR data, in good agreement with the published data <sup>13</sup>.

**Emodin (10):** yellow powder, IR (ZnSe)  $\text{cm}^{-1}$  3339, 1651, 1627, 1264, 1220, 1171; For UV and ESI-MS data, see **Supplementary Figure 4**;  $^1\text{H}$  NMR data, in good agreement with the published data <sup>14</sup>;  $^{13}\text{C}$  NMR data, see **Supplementary Table 4**.

**$\omega$ -Hydroxyemodin (11):** yellow powder, IR (ZnSe)  $\text{cm}^{-1}$  3404, 1682, 1628, 1434, 1206, 1137; For UV and ESI-MS data, see **Supplementary Figure 4**;  $^1\text{H}$  NMR data, in good agreement with the published data <sup>14</sup>;  $^{13}\text{C}$  NMR data, see **Supplementary Table 4**.

**Emodic acid (12):** yellow powder, IR (ZnSe)  $\text{cm}^{-1}$  3422, 1682, 1628, 1436, 1206, 1143; For UV and ESI-MS data, see **Supplementary Figure 4**;  $^1\text{H}$  NMR data, in good agreement with the published data <sup>14</sup>;  $^{13}\text{C}$  NMR data, see **Supplementary Table 4**.

**2-Hydroxyemodin (13):** brown powder, IR (ZnSe)  $\text{cm}^{-1}$  3384, 1621, 1471, 1371, 1278, 1235; For UV and ESI-MS data, see **Supplementary Figure 4**;  $^1\text{H}$  NMR data, in good agreement with the published data <sup>14</sup>;  $^{13}\text{C}$  NMR data, see **Supplementary Table 4**.

**2-Aminoemodin (14):** brown powder, IR (ZnSe)  $\text{cm}^{-1}$  3382, 1621, 1470, 1372, 1283, 1215; For UV and ESI-MS data, see **Supplementary Figure 4**;  $^1\text{H}$  and  $^{13}\text{C}$  NMR data, see **Supplementary Table 4**. HRTOFMS,  $[\text{M}+\text{H}]^+$   $m/z$  found 286.0710; calc. for  $\text{C}_{15}\text{H}_{12}\text{NO}_5$ : 286.0715.

**F9775B (17):** yellow powder;  $[\alpha]_{\text{D}}^{25}$   $0.0^\circ$  (MeOH, c 0.7); IR (ZnSe)  $\text{cm}^{-1}$  3306, 1732, 1638, 1527, 1512, 1322, 1230, 1084; For UV and ESI-MS data, see **Supplementary Figure 4**;  $^1\text{H}$  and  $^{13}\text{C}$  NMR data ( $\text{DMSO}-d_6$ ), see **Supplementary Table 5**.  $^1\text{H}$  and  $^{13}\text{C}$  NMR data ( $\text{CD}_3\text{OD}$ ) are in good agreement with the published data <sup>15</sup> except that we detected a resonance ( $\delta_{\text{H}} = 6.27$ ) not previously reported. The structures presented in the patent predict three olefinic and aromatic proton resonances, in accordance with our NMR data. Also our  $^{13}\text{C}$  resonances are down shifted 2.5 ppm with respect to every resonance previously reported.

**F9775A (18):** yellow powder;  $[\alpha]_{\text{D}}^{25}$   $0.0^\circ$  (MeOH, c 0.3); IR (ZnSe)  $\text{cm}^{-1}$  3306, 1733, 1637, 1530, 1512, 1322, 1230, 1084; For UV and ESI-MS data, see **Supplementary Figure 4**.  $^1\text{H}$  and  $^{13}\text{C}$  NMR data ( $\text{DMSO}-d_6$ ), see **Supplementary Table 5**;  $^1\text{H}$  and  $^{13}\text{C}$  NMR data ( $\text{CD}_3\text{OD}$ ), in good agreement with the published data <sup>15</sup>.

## References

1. Shimizu, K., & Keller, N.P. *Genetics* **157**, 591-600 (2001).
2. Osmani, A.H., May, G.S. & Osmani, S.A. *J. Biol. Chem.* **274**, 23565-23569 (1999).
3. Bok, J.W. & Keller, N.P. *Eukaryot. Cell* **3**, 527-535 (2004).
4. Nayak, T. *et al. Genetics* **172**, 1557-1566 (2006).
5. Szewczyk, E. *et al. Nat. Protoc.* **1**, 3111-3120 (2006).
6. Weidner, G., d'Enfert, C., Koch, A., Mol, P.C. & Brakhage, A.A. *Curr. Genet.* **33**, 378-385 (1998).
7. Waring, R. B., May, G. S. and Morris, N. R. *Gene* **79**, 119-130 (1989).
8. Sambrook, J., Fritsch, E. F. & Maniatis, T. Cold Spring Harbor Laboratory Press (Cold Spring Harbor, New York, USA, 1989).
9. Lee, S.B. & Taylor, J.W. In *PCR protocols: A guide to methods and applications*. (ed. M.A. Innis) 282-287 (Academic Press, San Diego; USA, 1990)
10. Bernreiter, A. *et al. Mol. Cell. Biol.* **27**, 791-802 (2007).
11. Simpson, T.J., Stenzel, D.J., Bartlett, A.J., O'Brien, E. & Holker, J.S.E. *J. Chem. Soc. Perkin Trans.* **1**, 2687-2692 (1982).
12. Marquez-Fernandez, O. *et al. Eukaryot. Cell* **6**, 710-720 (2007).
13. Krick, A. *et al. J. Nat. Prod.* **70**, 353-360 (2007).
14. Morooka, N., Nakano, S., Itoi, N. & Ueno, Y. *Agric. Biol. Chem.* **54**, 1247-1252 (1990).
15. Sato, S., Morishita, T., Hosoya, T. & Ishikawa, Y. (ed. Koho, J.K.T.) 11 Japan; 1999).
